# Supplementary material for: Escaping and repairing behaviors of the termite Odontotermes formosanus (Blattodea: Termitidae) in response to disturbance
Source: PeerJ. 2018 Mar 16;6:e4513. doi: 10.7717/peerj.4513 (PMC5858535; doi:10.7717/peerj.4513)
Supplement: Data S1 [file peerj-06-4513-s008.xlsx]

## Sheet: Sheet1
Escaping speed of termites
vedio	number	individual escaping phase			escaping flow phase
					EF1			EF2			EF3
		length (mm)	time (s)	speed (mm/s)	length (mm)	time (s)	speed (mm/s)	length (mm)	time (s)	speed (mm/s)	length (mm)	time (s)	speed (mm/s)
vedio1	1	38.284	12.91	2.96545	31.689	3.91	8.1046	27.324	3.45	7.92	19.781	3.17	6.24006
	2	38.284	17.58	2.1777	31.689	4.42	7.16946	27.324	4.64	5.88879	19.781	2.87	6.89233
	3	38.284	10.48	3.65305	31.689	5.05	6.27505	27.324	4.31	6.33968	19.781	2.03	9.74433
	4	38.284	10.1	3.7905	31.689	4.59	6.90392	27.324	3.09	8.84272	19.781	2.81	7.0395
	5	38.284	13.32	2.87417	31.689	5.45	5.8145	27.324	3.97	6.88262	19.781	3.1	6.38097
	6	38.284	8.78	4.36036	31.689	3.86	8.20959	27.324	3.6	7.59	19.781	2.56	7.72695
	7	38.284	8.05	4.75578	31.689	4.02	7.88284	27.324	4.17	6.55252	19.781	3.14	6.29968
	8	38.284	14.02	2.73067	31.689	5.6	5.65875	27.324	4.14	6.6	19.781	3.21	6.16231
	9	38.284	10.65	3.59474	31.689	4.34	7.30161	27.324	3.97	6.88262	19.781	2.61	7.57893
	10	38.284	13.65	2.80469	31.689	3.96	8.00227	27.324	4.06	6.73005	19.781	2.69	7.35353
vedio2	1	47.171	11.06	4.26501	37.59	3.46	10.8642	28.918	3.2	9.03687	20.684	2.62	7.89466
	2	47.171	11.25	4.19298	37.59	3.43	10.9592	28.918	3.02	9.5755	20.684	1.91	10.8293
	3	47.171	15.51	3.04133	37.59	3.9	9.63846	28.918	2.69	10.7502	20.684	2.44	8.47705
	4	47.171	14.92	3.1616	37.59	3.62	10.384	28.918	3.59	8.05515	20.684	2.21	9.35928
	5	47.171	12.11	3.89521	37.59	3.55	10.5887	28.918	3.28	8.81646	20.684	2.27	9.11189
	6	47.171	10.44	4.5183	37.59	3.42	10.9912	28.918	3.06	9.45033	20.684	2.07	9.99227
	7	47.171	11.96	3.94406	37.59	3.72	10.1048	28.918	2.88	10.041	20.684	1.99	10.394
	8	47.171	10.19	4.62915	37.59	5.05	7.44356	28.918	2.4	12.0492	20.684	1.76	11.7523
	9	47.171	11.45	4.11974	37.59	3.67	10.2425	28.918	3.21	9.00872	20.684	2.31	8.95411
	10	47.171	11.53	4.09115	37.59	4.7	7.99787	28.918	3.37	8.58101	20.684	2.42	8.54711
vedio9	1	46.295	17.33	2.67138	38.467	4.81	7.9973	30.89	2.53	12.2095	21.596	2.17	9.95207
	2	46.295	15.91	2.90981	38.467	5.27	7.29924	30.89	3.31	9.33233	21.596	2.68	8.05821
	3	46.295	14.34	3.22838	38.467	5.37	7.16331	30.89	3.87	7.98191	21.596	2.37	9.11224
	4	46.295	10.29	4.49903	38.467	4.56	8.43575	30.89	3.21	9.62305	21.596	2.52	8.56984
	5	46.295	8.4	5.51131	38.467	4.26	9.02981	30.89	2.59	11.9266	21.596	1.67	12.9317
	6	46.295	13.55	3.41661	38.467	4.66	8.25472	30.89	3.02	10.2285	21.596	1.91	11.3068
	7	46.295	11.92	3.88381	38.467	4.84	7.94773	30.89	3.3	9.36061	21.596	1.79	12.0648
	8	46.295	9.44	4.90413	38.467	4.09	9.40513	30.89	3.49	8.851	21.596	2.16	9.99815
	9	46.295	11.4	4.06096	38.467	3.38	11.3808	30.89	2.86	10.8007	21.596	2.66	8.1188
	10	46.295	13.17	3.51519	38.467	3.68	10.453	30.89	3.51	8.80057	21.596	1.93	11.1896
vedio11	1	76.498	11.12	6.87932	62.853	6.64	9.46581	45.999	4.32	10.6479	23.204	2.18	10.644
	2	76.498	17.95	4.26173	62.853	6.42	9.79019	45.999	5.65	8.14142	23.204	1.56	14.8744
	3	76.498	18.1	4.22641	62.853	5.59	11.2438	45.999	4.23	10.8745	23.204	2.21	10.4995
	4	76.498	16.62	4.60277	62.853	7.44	8.44798	45.999	3.84	11.9789	23.204	1.76	13.1841
	5	76.498	16.09	4.75438	62.853	4.54	13.8443	45.999	4.16	11.0575	23.204	2.37	9.79072
	6	76.498	16.6	4.60831	62.853	5.22	12.0408	45.999	3.77	12.2013	23.204	1.56	14.8744
	7	76.498	20.69	3.69734	62.853	7.52	8.35811	45.999	4.93	9.33043	23.204	2.09	11.1024
	8	76.498	13.67	5.59605	62.853	6.17	10.1869	45.999	3.99	11.5286	23.204	1.78	13.036
	9	76.498	14.32	5.34204	62.853	6.62	9.49441	45.999	4.54	10.1319	23.204	2.02	11.4871
	10	76.498	15.78	4.84778	62.853	6.88	9.13561	45.999	4.24	10.8488	23.204	2.16	10.7426
vedio18	1	52.896	12.65	4.1815	47.496	7.41	6.40972	41.362	4.62	8.95281	33.025	3.91	8.44629
	2	52.896	14.52	3.64298	47.496	6.6	7.19636	41.362	5.49	7.53406	33.025	3.99	8.27694
	3	52.896	16.58	3.19035	47.496	6.8	6.98471	41.362	4.19	9.8716	33.025	3.61	9.1482
	4	52.896	10.05	5.26328	47.496	5.72	8.3035	41.362	4.24	9.75519	33.025	2.68	12.3228
	5	52.896	14.08	3.75682	47.496	6.65	7.14226	41.362	4.36	9.4867	33.025	3.98	8.29774
	6	52.896	8.64	6.12222	47.496	6.44	7.37516	41.362	3.47	11.9199	33.025	4.24	7.78892
	7	52.896	13.77	3.84139	47.496	6.75	7.03644	41.362	4.34	9.53041	33.025	4.12	8.01578
	8	52.896	9.86	5.36471	47.496	6.52	7.28466	41.362	3.1	13.3426	33.025	4.37	7.55721
	9	52.896	12.05	4.38971	47.496	5.11	9.29472	41.362	3.69	11.2092	33.025	3.19	10.3527
	10	52.896	9.38	5.63923	47.496	5.64	8.42128	41.362	3.99	10.3664	33.025	2.89	11.4273
vedio19	1	54.313	10.78	5.03831	48.441	4.07	11.902	35.849	3.17	11.3088	25.456	2.02	12.602
	2	54.313	8.57	6.33757	48.441	5.47	8.85576	35.849	3.51	10.2134	25.456	2.78	9.15683
	3	54.313	11.33	4.79373	48.441	4.56	10.623	35.849	3.48	10.3014	25.456	3.15	8.08127
	4	54.313	11.46	4.73935	48.441	3.48	13.9198	35.849	3.12	11.4901	25.456	2.46	10.348
	5	54.313	11.88	4.5718	48.441	4.53	10.6934	35.849	4.72	7.59513	25.456	2.51	10.1418
	6	54.313	9.32	5.82758	48.441	6.55	7.39557	35.849	4.37	8.20343	25.456	3.21	7.93022
	7	54.313	10.4	5.2224	48.441	6.39	7.58075	35.849	3.11	11.527	25.456	2.06	12.3573
	8	54.313	9.18	5.91645	48.441	5.12	9.46113	35.849	3.54	10.1268	25.456	2.64	9.64242
	9	54.313	10.03	5.41505	48.441	4.73	10.2412	35.849	3.98	9.00729	25.456	2.74	9.29051
	10	54.313	9.74	5.57628	48.441	4.19	11.5611	35.849	3.42	10.4822	25.456	3.32	7.66747
vedio29	1	59.789	15.39	3.88493	56.575	6.94	8.15202	48.209	5.42	8.89465	39.928	4.31	9.26404
	2	59.789	13.64	4.38336	56.575	5.99	9.44491	48.209	4.96	9.71956	39.928	4.84	8.24959
	3	59.789	15.12	3.9543	56.575	5.65	10.0133	48.209	4.78	10.0856	39.928	3.84	10.3979
	4	59.789	13.74	4.35146	56.575	5.46	10.3617	48.209	3.88	12.425	39.928	4.19	9.52936
	5	59.789	11.13	5.37188	56.575	6.14	9.21417	48.209	4.08	11.8159	39.928	3.48	11.4736
	6	59.789	16.15	3.70211	56.575	6.37	8.88148	48.209	3.87	12.4571	39.928	2.87	13.9122
	7	59.789	14.11	4.23735	56.575	6.86	8.24708	48.209	5.17	9.32476	39.928	2.92	13.674
	8	59.789	12.21	4.89672	56.575	5.62	10.0667	48.209	4.15	11.6166	39.928	3.38	11.813
	9	59.789	18.85	3.17183	56.575	7.31	7.7394	48.209	4.71	10.2355	39.928	2.78	14.3626
	10	59.789	17.32	3.45202	56.575	5.26	10.7557	48.209	3.64	13.2442	39.928	4.03	9.90769
vedio31	1	60.902	11.95	5.0964	49.477	5.42	9.1286	34.448	4.07	8.46388	25.15	2.61	9.63602
	2	60.902	15.76	3.86434	49.477	5.75	8.6047	34.448	3.84	8.97083	25.15	3.41	7.37537
	3	60.902	9.16	6.64869	49.477	6.57	7.53075	34.448	3.97	8.67708	25.15	3.26	7.71472
	4	60.902	13.76	4.42602	49.477	6.41	7.71872	34.448	2.76	12.4812	25.15	2.22	11.3288
	5	60.902	10.51	5.79467	49.477	4.81	10.2863	34.448	3.89	8.85553	25.15	2.75	9.14545
	6	60.902	12.33	4.93933	49.477	6.81	7.26535	34.448	4.16	8.28077	25.15	3.23	7.78638
	7	60.902	15.83	3.84725	49.477	6.04	8.19156	34.448	4.4	7.82909	25.15	1.99	12.6382
	8	60.902	15.31	3.97792	49.477	5.45	9.07835	34.448	4.04	8.52673	25.15	2.64	9.52652
	9	60.902	19.1	3.18859	49.477	5.69	8.69543	34.448	3.96	8.69899	25.15	3.05	8.2459
	10	60.902	10.62	5.73465	49.477	5.01	9.87565	34.448	4.96	6.94516	25.15	2.56	9.82422
vedio32	1	51.907	14.03	3.69971	43.554	5.31	8.20226	27.645	3.82	7.23691	19.519	1.56	12.5122
	2	51.907	15.1	3.43755	43.554	4.73	9.20803	27.645	4.24	6.52005	19.519	2.21	8.83213
	3	51.907	11.69	4.44029	43.554	6.04	7.21093	27.645	3.87	7.14341	19.519	2.27	8.59868
	4	51.907	15.24	3.40597	43.554	6.18	7.04757	27.645	2.67	10.3539	19.519	2.65	7.36566
	5	51.907	12.41	4.18268	43.554	7.57	5.7535	27.645	5.21	5.30614	19.519	2.11	9.25071
	6	51.907	13.87	3.74239	43.554	7.72	5.64171	27.645	2.82	9.80319	19.519	2.51	7.77649
	7	51.907	12.61	4.11634	43.554	6.5	6.70062	27.645	2.72	10.1636	19.519	3.19	6.11881
	8	51.907	10.84	4.78847	43.554	6.71	6.49091	27.645	3.81	7.25591	19.519	2.34	8.34145
	9	51.907	11.54	4.49801	43.554	6.05	7.19901	27.645	3.33	8.3018	19.519	2.51	7.77649
	10	51.907	9.92	5.23256	43.554	5.74	7.5878	27.645	4.34	6.36982	19.519	2.94	6.63912
vedio41	1	52.871	11.1	4.76315	45.129	4.1	11.0071	34.557	2.96	11.6747	26.335	2.31	11.4004
	2	52.871	10.44	5.06427	45.129	3.89	11.6013	34.557	2.86	12.0829	26.335	2.97	8.867
	3	52.871	7.16	7.38422	45.129	4.06	11.1155	34.557	3.86	8.95259	26.335	2.26	11.6527
	4	52.871	11.15	4.74179	45.129	4.51	10.0064	34.557	3.34	10.3464	26.335	1.77	14.8785
	5	52.871	10.65	4.96441	45.129	3.67	12.2967	34.557	3.22	10.732	26.335	1.99	13.2337
	6	52.871	11.56	4.57362	45.129	3.86	11.6915	34.557	2.82	12.2543	26.335	2.03	12.9729
	7	52.871	12.63	4.18614	45.129	3.9	11.5715	34.557	2.42	14.2798	26.335	2.74	9.61131
	8	52.871	9.13	5.79091	45.129	3.27	13.8009	34.557	3.13	11.0406	26.335	2.4	10.9729
	9	52.871	11.27	4.6913	45.129	4.01	11.2541	34.557	2.76	12.5207	26.335	2.46	10.7053
	10	52.871	8.79	6.0149	45.129	4.32	10.4465	34.557	2.28	15.1566	26.335	1.91	13.788
	Total			100			100			100			100
	Mean			4.42456			9.0268			9.68717			9.8422
	SE			0.0983535			0.185395			0.195821			0.217745
Note: Ten termites that exhibited escaping behavior were randomly selected within the individual escaping phase of each video for speed measurement. We also measured the speed of 10 individual termites during the escaping flow phase, which was separated into 3 time periods (5-6 min after the escaping flow was formed [EF1], in the middle of the escaping flow duration [EF2], and 5-6 min before the …
