# Supplementary material for: Escaping and repairing behaviors of the termite Odontotermes formosanus (Blattodea: Termitidae) in response to disturbance
Source: PeerJ. 2018 Mar 16;6:e4513. doi: 10.7717/peerj.4513 (PMC5858535; doi:10.7717/peerj.4513)
Supplement: Data S2 [file peerj-06-4513-s009.xlsx]

## Sheet: Sheet1
1 hours of termite data statistics
Colony group	Vedio number	Type		Time（min）	5min	10min	15min	20min	25min	30min	35min	40min	50min	60min
1	1	Ⅰ	length （mm）	Total length	41.68	41.68	41.68	41.68	41.68	41.68	41.68
				Up to down	2.15	4	4.06	4.14	4.54	5.02	7
				Down to up	4.11	4.75	7.61	11.54	17.42	24.48	31.26
			area (mm2)	Up to down	4.3	6	7.1	10.7	20.3	32.6	52.4
				Down to up	12.1	18.6	41.6	78.4	128.5	207.8	244.4
				Side	0	4.9	4.2	21.3	28.8	16.2	23
1	2	Ⅰ	length （mm）	Total length	54.56	54.56	54.56	54.56	54.56	54.56
				Up to down	2.48	6.82	7.84	9.21	10.41	12.61
				Down to up	1.86	3.99	9.26	13.72	23.3	34.65
			area (mm2)	Up to down	19.8	27.1	83.1	106.6	147.7	167.2
				Down to up	11.5	33.9	97.1	139.1	276.4	362.5
				Side	0	4.5	38.2	76.9	146.2	71.5
2	3	Ⅰ	length （mm）	Total length	58.58	58.58	58.58	58.58	58.58	58.58	58.58	58.58	58.58
				Up to down	0	0	0	1.52	3.27	5.23	5.83	6.07	11.493
				Down to up	0	1.62	2.93	7.29	9.95	14.53	20.65	28.81	40.516
			area (mm2)	Up to down	0	0	0	6.1	13.4	36.5	42.9	50.4	98.296
				Down to up	0	13.5	33.7	58.5	126.9	168.6	246.5	332.5	479.369
				Side	0	0	0	13.1	22.7	34.5	46.6	37.9	46.771
3	4	Ⅰ	length （mm）	Total length	59.77	59.77	59.77	59.77	59.77	59.77	59.77	59.77
				Up to down	0	2.48	3.59	4.76	6.32	7.42	10	17.953
				Down to up	4.98	3.76	6.96	12.85	21.31	32.27	41.23	43.861
			area (mm2)	Up to down	0	15.2	25.9	33.4	38.4	60.2	99.4	195.829
				Down to up	22.5	38.6	64.2	123.6	189.6	316.1	443.9	473.173
				Side	0	24.8	43.2	82.3	85.4	93	91.9	38.864
3	5	Ⅱ	length （mm）	Total length	59.65	59.65	59.65	59.65	59.65	59.65	59.65	59.65	59.65	59.65
				Up to down	0	0.57	1.61	1.8	2.15	3.71	4.01	4.07	4.07	4.07
				Down to up	1.61	4.6	8.34	10.18	12.5	13.08	19.33	20.95	22.3	26.484
			area (mm2)	Up to down	0	6.9	11.7	11.3	16.8	21.1	23	23.6	23.6	23.6
				Down to up	12.5	34.6	70.1	95.4	129.2	141.1	196.8	191.3	233.672	263.183
				Side	0	0	0	16.9	32.6	53.2	45	56	41.221	45.81
4	6	Ⅲ	length （mm）	Total length	44.63	44.63	44.63	44.63	44.63	44.63	44.63	44.63	44.63	44.63
				Up to down	0.81	2.02	4.54	8.61	9.9	10.79	13.76	16.12	19.63	20.839
				Down to up	1.42	4.38	5.18	8.14	10.74	10.82	10.96	14.47	15.704	15.745
			area (mm2)	Up to down	5.6	12.8	29.2	59.5	66	68.8	90.2	104.1	158.103	159.947
				Down to up	6.1	26.9	34.3	59.4	66.8	68.4	70.1	98.4	125.849	125.935
				Side	0	0	0	0	0	0	0	0	0	0
4	7	Ⅳ	length （mm）	Total length	63.91	63.91	63.91	63.91	63.91	63.91	63.91	63.91	63.91	63.91
				Up to down	0	0	1.23	1.23	1.23	1.23	1.23	1.23	1.23	1.23
				Down to up	0	1.39	1.56	1.56	1.56	1.56	1.56	1.56	1.56	1.56
			area (mm2)	Up to down	0	0	1.1	1.1	1.1	1.1	1.1	1.1	1.1	1.1
				Down to up	0	4.9	4.9	4.9	4.9	4.9	4.9	4.9	4.9	4.9
				Side	0	0	0	0	0	0	0	0	0	0
5	8	Ⅰ	length （mm）	Total length	56.36	56.36	56.36	56.36	56.36	56.36	56.36	56.36
				Up to down	2.73	5.13	5.37	6.28	7.35	10.32	10.36	12.8
				Down to up	2.09	2.94	3.17	5.72	11.71	28.86	32.02	37.07
			area (mm2)	Up to down	9.1	16.1	19.6	24.2	29.3	79.1	75.2	117.6
				Down to up	8.9	10.8	31.7	71.8	112.1	286.4	353.7	401.5
				Side	0	14.9	17.1	97	126.3	98	72	76.1
5	9	Ⅰ	length （mm）	Total length	54.69	54.69	54.69	54.69	54.69	54.69	54.69	54.69	54.69	54.69
				Up to down	0	1.11	4.69	7.81	8.1	8.61	8.78	9.65	10.635	13.063
				Down to up	0	0.63	1.6	2.83	5.65	6.9	12.9	18.14	26.255	40.954
			area (mm2)	Up to down	0	3.7	12.2	31.1	32.6	36	36.2	42.9	47.947	79.401
				Down to up	0	1.6	7.9	16.4	44.5	59.9	120.2	167.6	200.89	350.7
				Side	0	0	0	10.8	20.7	40.8	73.4	83.2	86.917	23.796
6	10	Ⅰ	length （mm）	Total length	56.68	56.68	56.68	56.68	56.68	56.68	56.68
				Up to down	1.27	1.39	1.95	3.9	5.62	7.06	8.564
				Down to up	3.82	10.54	13.52	28.43	31.97	40.52	45.113
			area (mm2)	Up to down	14.3	23	37.5	42.1	84.1	140.5	188.666
				Down to up	49.2	137.9	232	420.6	547.5	658.7	815.62
				Side	47	94.7	180	104.4	140	154.1	104.176
6	11	Ⅰ	length （mm）	Total length	83.78	83.78	83.78	83.78	83.78	83.78	83.78	83.78
				Up to down	1.63	2.22	3.2	3.87	4.07	4.91	6.72	7.02
				Down to up	12.08	16.7	27.02	38.14	44.89	57.75	66.3	70.58
			area (mm2)	Up to down	11.1	19.7	31.6	38.2	47.9	68.1	95.8	135.8
				Down to up	122.8	183	331.3	496.7	610	784.5	1004.1	1084.7
				Side	31.6	121.1	104.6	134.5	190.3	141.9	146.9	183.8
7	12	Ⅰ	length （mm）	Total length	37.94	37.94	37.94	37.94	37.94	37.94
				Up to down	1.05	1.65	3.29	4.31	6.88	8.269
				Down to up	1.66	6.76	10.34	16.72	23.32	28.105
			area (mm2)	Up to down	9.5	19.3	21.1	44.6	61.1	77.39
				Down to up	26.6	61.1	105.3	189.3	270.5	316.58
				Side	3.4	17.8	43.6	50.6	53	18.974
7	13	Ⅰ	length （mm）	Total length	57.8	57.8	57.8	57.8	57.8	57.8	57.8
				Up to down	1.24	1.67	1.7	2.06	4.22	6.75	11.501
				Down to up	3.93	7.47	11.2	15.86	27.91	38.26	42.202
			area (mm2)	Up to down	7.4	7.3	19.8	20.8	29.2	60.3	111.57
				Down to up	29.7	63.8	104.7	175.9	309.7	398.1	449.726
				Side	10.8	18.2	43.9	66.4	96.9	54.5	20.575
8	14	Ⅰ	length （mm）	Total length	57.68	57.68	57.68	57.68	57.68	57.68	57.68	57.68	57.68
				Up to down	0	0	0	0	0	0	0	0	0
				Down to up	2.6	6.05	8.98	11.04	17.25	22.08	25.96	33	45.323
			area (mm2)	Up to down	0	0	0	0	0	0	0	0	0
				Down to up	15.8	47.2	69.1	109.2	151.8	221.7	239.1	302.8	423.843
				Side	0	0	17.2	19	9.3	13.4	37.5	14.7	26.632
8	15	Ⅲ	length （mm）	Total length	66.15	66.15	66.15	66.15	66.15	66.15	66.15	66.15	66.15	66.15
				Up to down	0	1.59	2.54	3.82	4.77	5.68	5.8	6.49	9.76	11.281
				Down to up	2.84	7.68	7.96	9.92	13.9	15.75	19.93	25.8	30.973	37.022
			area (mm2)	Up to down	0	3.2	9.2	15.3	27.6	25.8	29.8	35.4	57.179	74.307
				Down to up	36.4	66	90	112.2	123	164.9	236.1	253.2	301.172	326.203
				Side	0	0	0	0	0	0	0	0	0	0
9	16	Ⅰ	length （mm）	Total length	53.09	53.09	53.09	53.09	53.09	53.09	53.09	53.09	53.09	53.09
				Up to down	0	0	0	0	0	0	0	0	0	0
				Down to up	0	2.97	3.92	5.44	6.64	12.91	19.88	21.43	24.953	27.828
			area (mm2)	Up to down	0	0	0	0	0	0	0	0	0	0
				Down to up	0	16.8	33.3	43.4	71.8	102	125.4	156.8	188.168	236.861
				Side	0	0	0	0	0	0	0	0	0	0
9	17	Ⅰ	length （mm）	Total length	44.48	44.48	44.48	44.48	44.48	44.48	44.48	44.48	44.48
				Up to down	0	0	0	0	0	0	0	0	0
				Down to up	1.22	3.8	5.98	10.75	14.53	20.14	27.06	32.35	43.336
			area (mm2)	Up to down	0	0	0	0	0	0	0	0	0
				Down to up	9.1	24.6	57.3	93.2	136.6	166.4	213.2	239.1	340.297
				Side	0	0	0	0	0	0	0	0	0
10	18	Ⅰ	length （mm）	Total length	54.98	54.98	54.98	54.98	54.98	54.98	54.98
				Up to down	1.12	1.98	2.3	4.1	4.94	7.28	9.19
				Down to up	3.96	7.44	10.92	16.5	18.32	21.72	39.19
			area (mm2)	Up to down	6.5	9.8	18.4	33.5	45.3	88.8	117.9
				Down to up	54.4	94.2	151.4	211.6	255.1	295.6	523.2
				Side	7.8	14.2	41.1	71.7	140.7	214.3	84.2
10	19	Ⅰ	length （mm）	Total length	58.16	58.16	58.16	58.16	58.16	58.16	58.16	58.16
				Up to down	1.42	2.03	2.36	3.65	4.74	6.8	9.13	11.09
				Down to up	2.53	3.73	7.84	11.62	17.38	21.34	28.98	33.43
			area (mm2)	Up to down	6.6	8.4	15.2	20.8	24	44.3	80.4	103.7
				Down to up	17.5	42.7	94.1	150.6	215.7	265.4	363.5	438.4
				Side	0	16.3	17.2	79.7	113.8	144.4	91	93.6
11	20	Ⅰ	length （mm）	Total length	54.45	54.45	54.45	54.45	54.45	54.45	54.45	54.45
				Up to down	0	0.54	0.9	2.14	2.45	2.46	3.73	3.91
				Down to up	5.11	8.68	10.63	18.84	21.38	27.87	34.13	39.6
			area (mm2)	Up to down	0	2.1	6.3	9.8	13.4	17	20.5	21.2
				Down to up	29.6	62.1	68	129.8	199.5	274.8	359.4	431.3
				Side	6.5	6.1	28.8	33.4	23.4	42.8	49.2	41.1
11	21	Ⅰ	length （mm）	Total length	55.58	55.58	55.58	55.58	55.58	55.58	55.58	55.58	55.58	55.58
				Up to down	0.79	1.56	2.08	2.84	2.9	3.1	3.26	3.55	4.021	4.047
				Down to up	1.74	5.74	12.16	18.07	24.13	24.21	26.67	29.48	40.097	43.696
			area (mm2)	Up to down	1.2	16.8	18.6	18.8	19	19.6	25.2	29.1	28.222	30.523
				Down to up	12.1	41.2	92.8	149.7	178.2	202.9	221.9	265	350.578	409.644
				Side	5.3	17.4	19	10.6	4	17.9	32.6	14.7	0	0
12	22	Ⅰ	length （mm）	Total length	60.93	60.93	60.93	60.93	60.93
				Up to down	1.53	1.7	2.74	4.39	5.86
				Down to up	5.49	11.57	19.84	28.86	44.72
			area (mm2)	Up to down	4.1	12.7	18.7	36.9	73.8
				Down to up	59	131.6	218.4	323.5	479.1
				Side	28.5	58.9	67.5	108.7	53.8
12	23	Ⅰ	length （mm）	Total length	63.45	63.45	63.45	63.45	63.45	63.45
				Up to down	1.26	2.5	4.85	7.74	9.93	18.204
				Down to up	5.07	10.95	22.64	30.27	39.85	45.325
			area (mm2)	Up to down	7.9	18	38.1	62	86	145.42
				Down to up	34	106.4	251.1	321.2	408.6	443.624
				Side	13.3	81.4	78.1	91.2	85.2	27.209
13	24	Ⅰ	length （mm）	Total length	50.04	50.04	50.04	50.04	50.04	50.04	50.04	50.04	50.04
				Up to down	0	0	0	0	0	2.16	3.27	3.55	4.321
				Down to up	2.68	7.11	12.01	15.5	19.56	22.43	27.69	30.76	40.049
			area (mm2)	Up to down	0	0	0	0	0	12.4	14.7	36	53.487
				Down to up	35.3	86.1	144	180.7	279.4	310.4	346.5	367.1	503.35
				Side	0	0	0	0	0	0	0	0	0
13	25	Ⅲ	length （mm）	Total length	57.07	57.07	57.07	57.07	57.07	57.07	57.07	57.07	57.07
				Up to down	1.5	1.75	2.19	4.1	3.65	5.76	5.96	6.98	12.356
				Down to up	1.75	6.46	9.5	13.11	16.33	20.75	23.58	27.51	38.756
			area (mm2)	Up to down	6.8	10.8	12.9	20.5	24	32.6	37	35.2	92.617
				Down to up	13.1	65.7	93.1	176.2	192.8	235.4	284.5	337.4	461.108
				Side	0	0	0	0	0	0	0	0	0
14	26	Ⅰ	length （mm）	Total length	58.7	58.7	58.7	58.7
				Up to down	0.98	1.82	4.18	6.91
				Down to up	8.82	20.85	30.48	39.74
			area (mm2)	Up to down	4.4	21.5	48.4	95.1
				Down to up	76	177.6	261.1	361.4
				Side	42.1	53.6	93.5	80.6
14	27	Ⅰ	length （mm）	Total length	56.33	56.33	56.33	56.33
				Up to down	1.28	3.04	7.68	8.89
				Down to up	5.94	29.64	44.31	42.88
			area (mm2)	Up to down	5.6	23	87.6	98.4
				Down to up	78.6	317	439.4	421.6
				Side	102.5	89.1	41.6	30.7
15	28	Ⅰ	length （mm）	Total length	42.62	42.62	42.62
				Up to down	1.27	3.86	9.43
				Down to up	6.73	15.03	28.38
			area (mm2)	Up to down	7.5	29.4	102.7
				Down to up	80.6	164.6	342.6
				Side	50.6	111	41.5
15	29	Ⅰ	length （mm）	Total length	64.03	64.03	64.03	64.03
				Up to down	0.88	3.19	8.04	10.18
				Down to up	5.3	12.86	21.59	32.81
			area (mm2)	Up to down	4.4	24.4	56.8	125.4
				Down to up	38.5	120.7	205	335.2
				Side	34.9	133.6	216.3	211.4
16	30	Ⅰ	length （mm）	Total length	48.84	48.84	48.84	48.84	48.84	48.84
				Up to down	1.65	2.84	2.97	3.59	3.94	9.57
				Down to up	3.7	8.65	12.61	18.39	27.76	35.81
			area (mm2)	Up to down	4.3	12.6	15.9	21.6	28.5	83.7
				Down to up	32.7	105.8	158.8	236.7	308	442.3
				Side	13.6	29.3	51	87.1	107.2	29.8
17	31	Ⅰ	length （mm）	Total length	61.72	61.72	61.72	61.72	61.72	61.72	61.72	61.72	61.72
				Up to down	0	1.38	2.16	2.61	3.63	4.43	5.56	6.92	10.667
				Down to up	2.63	6.24	10.15	12.36	16.96	21.04	25.44	28.03	43.478
			area (mm2)	Up to down	0	5.6	14.8	17.8	28.2	39	47.7	56.6	95.603
				Down to up	14	51	82.7	113.8	145.4	183.7	231.5	259.7	415.676
				Side	0	17.7	20.2	42.7	57.1	53	57.4	82	49.08
18	32	Ⅰ	length （mm）	Total length	50.86	50.86	50.86	50.86	50.86	50.86	50.86
				Up to down	1.63	3.51	5.23	6.93	10.32	12.64	14.06
				Down to up	1.45	6.22	8.96	16.51	20.82	23.17	28.84
			area (mm2)	Up to down	8.8	22	34	55.4	97.3	117.3	140.4
				Down to up	16.3	39	75.2	134.6	171.3	195.7	240.9
				Side	10.5	33.2	83.7	70	67.5	97.2	77.5
18	33	Ⅱ	length （mm）	Total length	63.98	63.98	63.98	63.98	63.98	63.98	63.98	63.98	63.98	63.98
				Up to down	2.11	4.26	6.61	7.83	9.65	10.84	11.54	11.83	12.113	12.38
				Down to up	8.24	9.85	11.45	14.35	17.89	18.8	24.69	25.94	27.066	27.254
			area (mm2)	Up to down	10.3	25.6	34.9	39.2	67	78.9	79.6	75.6	105.676	115.528
				Down to up	32.5	44.8	66.7	116.4	137.2	156.3	186	222.6	263.438	275.15
				Side	0	10.4	34.1	40.8	16.9	7.9	19.4	20.7	88.302	81.266
19	34	Ⅱ	length （mm）	Total length	58.29	58.29	58.29
				Up to down	1.63	2.63	5.79
				Down to up	4.91	13.67	26.38
			area (mm2)	Up to down	10	24.1	46.1
				Down to up	67.4	157.4	296
				Side	18.9	35.6	95
19	35	Ⅱ	length （mm）	Total length	58.4	58.4	58.4	58.4	58.4	58.4	58.4	58.4	58.4	58.4
				Up to down	0	0	0	0	0	0	0	0	0	0
				Down to up	0.8	1.85	4.36	6.71	8.06	8.96	11.85	13.14	16.136	19.991
			area (mm2)	Up to down	0	0	0	0	0	0	0	0	0	0
				Down to up	1.7	17.6	30.3	41.6	52.8	61.3	68.2	75.5	111.722	112.555
				Side	0	0	0	0	0	0	0	0	0	0
20	36	Ⅱ	length （mm）	Total length	62.72	62.72	62.72	62.72	62.72	62.72	62.72	62.72	62.72	62.72
				Up to down	1.49	1.49	1.49	1.49	1.49	1.49	1.49	1.49	1.49	1.49
				Down to up	0	0	0	0	0	2.28	4.74	5.18	12.114	14.473
			area (mm2)	Up to down	0.7	0.7	0.7	0.7	0.7	0.7	0.7	0.7	0.7	0.7
				Down to up	0	0	0	0	0	10.5	15.7	22	91.697	103.977
				Side	0	0	0	0	0	0	0	0	0	0
20	37	Ⅱ	length （mm）	Total length	65.36	65.36	65.36	65.36	65.36	65.36	65.36	65.36	65.36	65.36
				Up to down	0	0	2.76	2.76	2.76	2.76	2.76	2.76	2.76	2.76
				Down to up	0	0	1.88	2.46	2.78	3.22	3.36	3.36	5.611	5.673
			area (mm2)	Up to down	0	0	2.5	2.5	2.5	2.5	2.5	2.5	2.5	2.5
				Down to up	0	0	4.2	4.5	9.2	14.3	15.6	15.6	22.092	22.934
				Side	0	0	0	0	0	0	0	0	0	0
21	38	Ⅰ	length （mm）	Total length	57.85	57.85	57.85	57.85	57.85
				Up to down	0.93	2.31	3.5	4.47	4.94
				Down to up	12.23	19.8	25.82	38.75	48.62
			area (mm2)	Up to down	3.3	7	13	26.9	28
				Down to up	78.1	153.9	205.1	332.8	424.8
				Side	47.5	54.5	85.1	93.5	33.2
21	39	Ⅰ	length （mm）	Total length	63.59	63.59	63.59	63.59	63.59	63.59	63.59	63.59
				Up to down	0	0.71	2.25	3.56	4.03	4.39	7	8.291
				Down to up	2.15	5.58	18.49	27.43	31.17	35.08	39.19	48.673
			area (mm2)	Up to down	0	2.6	8.8	9.6	11.1	17.4	51.2	56.615
				Down to up	17.2	39.9	131.5	213.2	244.6	273.9	335	445.502
				Side	33.9	87.9	56.7	64.3	84.6	133.4	92.7	56.294
22	40	Ⅰ	length （mm）	Total length	51.14	51.14	51.14	51.14	51.14
				Up to down	2.38	2.6	3.94	6.05	8.4
				Down to up	3.62	7.19	12.9	19.45	29.33
			area (mm2)	Up to down	15.4	23.5	39	65.9	107.2
				Down to up	19.3	66.8	133.7	210.6	332
				Side	40.2	67.4	101.2	131.6	134
22	41	Ⅰ	length （mm）	Total length	62.97	62.97	62.97	62.97	62.97	62.97	62.97	62.97	62.97	62.97
				Up to down	0	0	0	0.64	1.62	1.62	1.86	1.88	1.979	2.684
				Down to up	1.46	2.47	3.58	7.89	8.41	10.87	12.63	15.56	19.655	24.764
			area (mm2)	Up to down	0	0	0	2.1	2.7	6.3	11.8	10.7	17.576	25.185
				Down to up	12.1	21.3	34.4	68.4	81	106.5	139.2	154.8	214.763	268.833
				Side	0	4.1	10.7	1.2	11	15.5	24.8	19.1	32.109	36.263
Note: "yellow area" means "closed"
